# Supplementary material for: New multifunctional 3D porous metal–organic framework with selective gas adsorption, efficient chemical fixation of CO2 and dye adsorption
Source: Royal Society of Chemistry journal article supplement (doi:10.1039/c9dt01249d), 2019-01-01
Supplement: c9dt01249d1.pdf [file c9dt01249d1.pdf]

## *Electronic Supplementary Information*

### **New multifunctional 3D porous metal-organic framework with selective gas adsorption, efficient chemical fixation of CO<sub>2</sub> and dye adsorption**

Shan Cheng, Yunlong Wu, Jing Jin, Jiao Liu, Dan Wu, Guoping Yang\* and Yao-Yu Wang

*Key Laboratory of Synthetic and Natural Functional Molecule Chemistry of the Ministry of Education, Shaanxi Key Laboratory of Physico-Inorganic Chemistry, College of Chemistry & Materials Science, Northwest University, Xi'an 710127, P. R. China*

**Table S1** Selected bond lengths (Å) and bond angles (°) for **1**.

| MOF <b>1</b>  |          |                      |            |
|---------------|----------|----------------------|------------|
| Mn(1)-O(1)    | 2.147(4) | O(6)-Mn(2)-O(3)#1    | 92.12(15)  |
| Mn(1)-O(2)#1  | 2.160(4) | O(6)-Mn(2)-O(4)      | 85.20(14)  |
| Mn(1)-O(7)#2  | 2.116(4) | O(6)-Mn(2)-O(15)     | 87.71(15)  |
| Mn(1)-O(9)#2  | 2.188(4) | O(6)-Mn(2)-O(16)#3   | 102.57(17) |
| Mn(1)-O(12)   | 2.247(3) | O(15)-Mn(2)-O(1)     | 83.64(13)  |
| Mn(1)-O(20)   | 2.136(4) | O(15)-Mn(2)-O(2)#1   | 85.58(13)  |
| Mn(2)-O(1)    | 2.489(4) | O(15)-Mn(2)-O(3)#1   | 90.25(15)  |
| Mn(2)-O(2)#1  | 2.367(4) | O(15)-Mn(2)-O(4)     | 85.00(13)  |
| Mn(2)-O(3)#1  | 2.282(4) | O(16)#3-Mn(2)-O(1)   | 88.25(16)  |
| Mn(2)-O(4)    | 2.333(4) | O(16)#3-Mn(2)-O(2)#1 | 85.91(15)  |
| Mn(2)-O(6)    | 2.125(4) | O(16)#3-Mn(2)-O(3)#1 | 89.82(16)  |
| Mn(2)-O(15)   | 2.185(4) | O(16)#3-Mn(2)-O(4)   | 95.30(15)  |
| Mn(2)-O(16)#3 | 2.140(4) | O(16)#3-Mn(2)-O(15)  | 169.71(16) |
| Mn(3)-O(4)    | 2.248(4) | O(4)-Mn(3)-O(18)#4   | 89.45(15)  |

---

|                     |            |                       |            |
|---------------------|------------|-----------------------|------------|
| Mn(3)-O(5)          | 2.104(4)   | O(5)-Mn(3)-O(4)       | 85.54(15)  |
| Mn(3)-O(11)         | 2.211(5)   | O(5)-Mn(3)-O(11)      | 91.2(2)    |
| Mn(3)-O(17)#3       | 2.066(4)   | O(5)-Mn(3)-O(18)#4    | 155.08(17) |
| Mn(3)-O(18)#4       | 2.357(4)   | O(5)-Mn(3)-O(19)#4    | 99.42(16)  |
| Mn(3)-O(19)#4       | 2.205(4)   | O(11)-Mn(3)-O(4)      | 173.33(18) |
| Mn(4)-O(8)#2        | 2.150(4)   | O(11)-Mn(3)-O(18)#4   | 95.9(2)    |
| Mn(4)-O(9)#2        | 2.275(4)   | O(17)#3-Mn(3)-O(4)    | 91.20(16)  |
| Mn(4)-O(10)#2       | 2.342(4)   | O(17)#3-Mn(3)-O(5)    | 110.76(17) |
| Mn(4)-O(12)         | 2.215(4)   | O(17)#3-Mn(3)-O(11)   | 84.5(2)    |
| Mn(4)-O(13)         | 2.141(4)   | O(17)#3-Mn(3)-O(18)#4 | 93.71(16)  |
| Mn(4)-O(14)         | 2.108(6)   | O(17)#3-Mn(3)-O(19)#4 | 149.08(17) |
| O(1)-Mn(1)-O(2)#1   | 83.13(14)  | O(19)#4-Mn(3)-O(4)    | 97.85(16)  |
| O(1)-Mn(1)-O(9)#2   | 96.20(15)  | O(19)#4-Mn(3)-O(11)   | 88.41(19)  |
| O(1)-Mn(1)-O(12)    | 87.94(14)  | O(19)#4-Mn(3)-O(18)#4 | 57.10(15)  |
| O(2)#1-Mn(1)-O(9)#2 | 171.49(15) | O(8)#2-Mn(4)-O(9)#2   | 92.19(15)  |
| O(2)#1-Mn(1)-O(12)  | 93.49(14)  | O(8)#2-Mn(4)-O(10)#2  | 83.72(15)  |
| O(7)#2-Mn(1)-O(1)   | 174.77(16) | O(8)#2-Mn(4)-O(12)    | 88.54(15)  |
| O(7)#2-Mn(1)-O(2)#1 | 94.56(15)  | O(9)#2-Mn(4)-O(10)#2  | 56.33(14)  |
| O(7)#2-Mn(1)-O(9)#2 | 85.40(15)  | O(12)-Mn(4)-O(9)#2    | 76.85(13)  |
| O(7)#2-Mn(1)-O(12)  | 87.52(15)  | O(12)-Mn(4)-O(10)#2   | 132.02(14) |
| O(7)#2-Mn(1)-O(20)  | 92.97(18)  | O(13)-Mn(4)-O(8)#2    | 174.29(18) |
| O(9)#2-Mn(1)-O(12)  | 78.00(13)  | O(13)-Mn(4)-O(9)#2    | 91.37(17)  |
| O(20)-Mn(1)-O(1)    | 91.76(17)  | O(13)-Mn(4)-O(10)#2   | 101.98(16) |
| O(20)-Mn(1)-O(2)#1  | 91.0(2)    | O(13)-Mn(4)-O(12)     | 87.92(16)  |
| O(20)-Mn(1)-O(9)#2  | 97.52(19)  | O(14)-Mn(4)-O(8)#2    | 88.2(2)    |
| O(20)-Mn(1)-O(12)   | 175.44(19) | O(14)-Mn(4)-O(9)#2    | 155.4(2)   |
| O(2)#1-Mn(2)-O(1)   | 72.04(12)  | O(14)-Mn(4)-O(10)#2   | 99.4(2)    |
| O(3)#1-Mn(2)-O(1)   | 128.23(13) | O(14)-Mn(4)-O(12)     | 127.7(2)   |
| O(3)#1-Mn(2)-O(2)#1 | 56.22(13)  | O(14)-Mn(4)-O(13)     | 90.5(2)    |
| O(3)#1-Mn(2)-O(4)   | 174.63(15) | Mn(1)-O(1)-Mn(2)      | 96.80(14)  |

---

|                   |            |                      |            |
|-------------------|------------|----------------------|------------|
| O(4)-Mn(2)-O(1)   | 53.75(12)  | Mn(1)#1-O(2)-Mn(2)#1 | 100.14(14) |
| O(4)-Mn(2)-O(2)#1 | 125.66(13) | Mn(3)-O(4)-Mn(2)     | 106.79(15) |
| O(6)-Mn(2)-O(1)   | 138.56(14) | Mn(1)#5-O(9)-Mn(4)#5 | 98.34(14)  |
| O(6)-Mn(2)-O(2)#1 | 147.52(14) | Mn(4)-O(12)-Mn(1)    | 98.39(13)  |

Symmetrical codes:#1 -x+2, -y+1, -z+1; #2 x, y-1, z; #3 x+1, y, z; #4 -x+2, -y, -z; #5 x, y+1, z; #6 x-1, y, z.

**Table S2** The temperature gradient experiments of the CO<sub>2</sub> cycloaddition catalyzed by MOF 1/TBAB.

| Entry | Epoxides                                                                            | Products                                                                             | Yield |
|-------|-------------------------------------------------------------------------------------|--------------------------------------------------------------------------------------|-------|
| 1     | 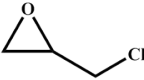   |    | ~80%  |
| 2     |   |   | ~95%  |
| 3     |  |  | ~98%  |
| 4     |  |  | >99%  |

Reaction condition: 2-(chloromethyl)oxirane (20 mmol); MOF 1 (0.1 mmol); TBAB (2 mmol); dioxygen gas: CO<sub>2</sub> containing balloon; reaction 25°C for 1; 40 °C for 2; 60 °C for 3; 80 °C for 4; reaction 8h.

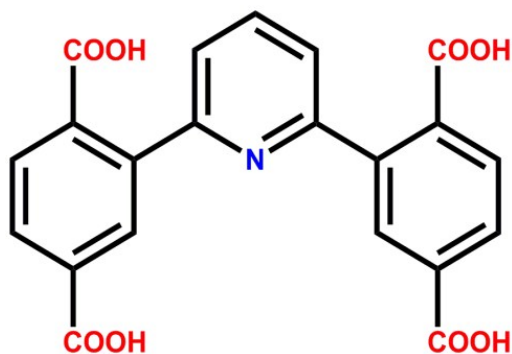

**Scheme S1** The structure of ligand 1,3-di(2',4'-dicarboxylphenyl)pyridine (H<sub>4</sub>L).

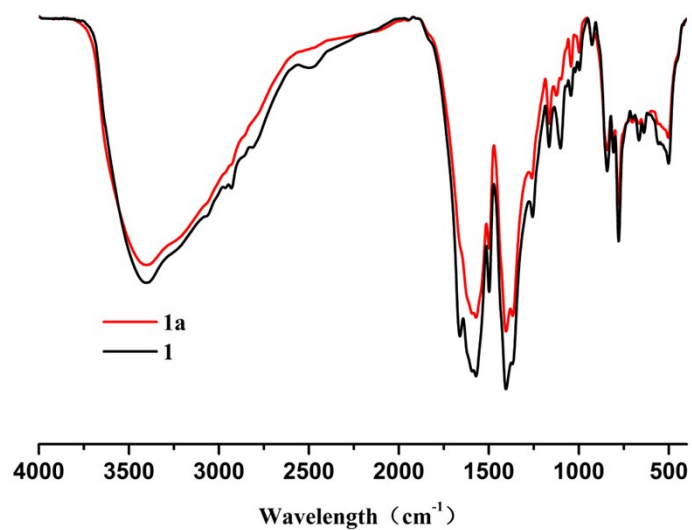

**Fig. S1** The FT-IR spectra of complexes **1** and **1a**.

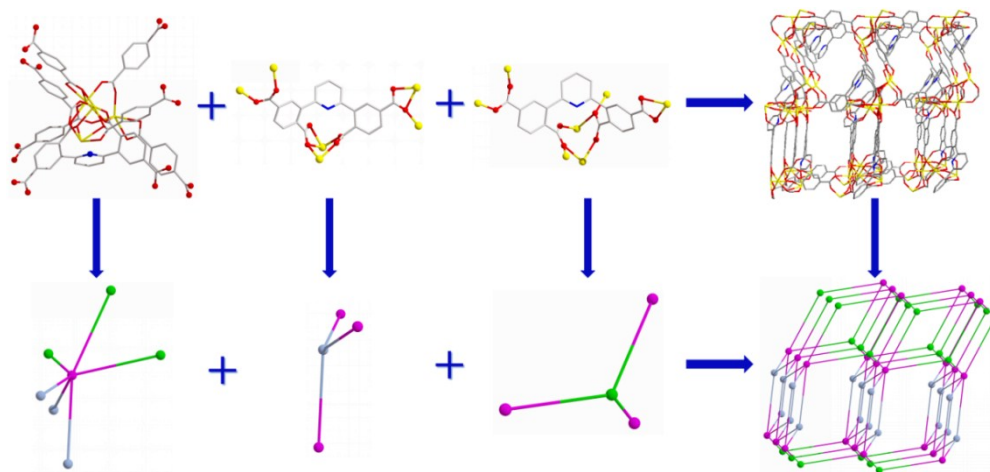

**Fig. S2** Topology analysis of **1**, where the 6-connected nodes are the  $Mn_4$  cluster, and the 3-connected nodes are the ligands.

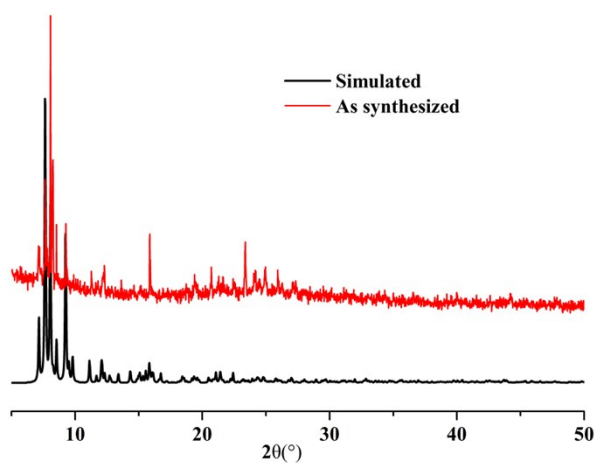

**Fig. S3** PXRD patterns of MOF **1** by the simulated from crystal data and new as-synthesized

sample.

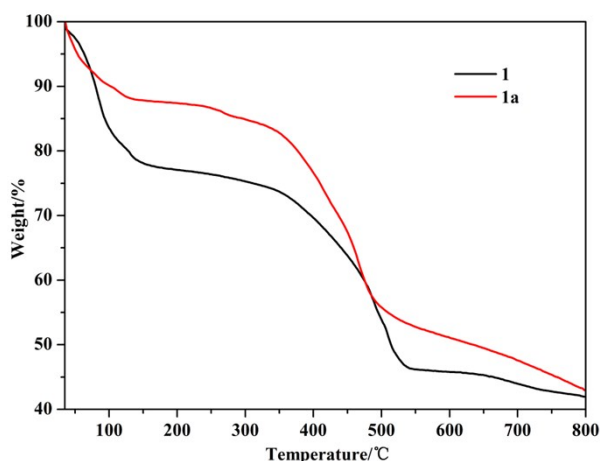

**Fig. S4** TGA curves of the as-synthesized **1** and desolvated sample **1a**.

### IAST adsorption selectivity calculation

The experimental isotherm data for pure CO<sub>2</sub> and CH<sub>4</sub> (measured at 273 and 298 K) were fitted using a Langmuir-Freundlich (L-F) model

$$q = \frac{a * b * p^c}{1 + b * p^c}$$

Where  $q$  and  $p$  are adsorbed amounts and pressures of component  $i$ , respectively. The adsorption selectivities for binary mixtures of CO<sub>2</sub>/CH<sub>4</sub> at 273 and 298 K, defined by

$$S_{ads} = (q_1 / q_2) / (p_1 / p_2)$$

Where  $q_i$  is the amount of  $i$  adsorbed and  $p_i$  is the partial pressure of  $i$  in the mixture.

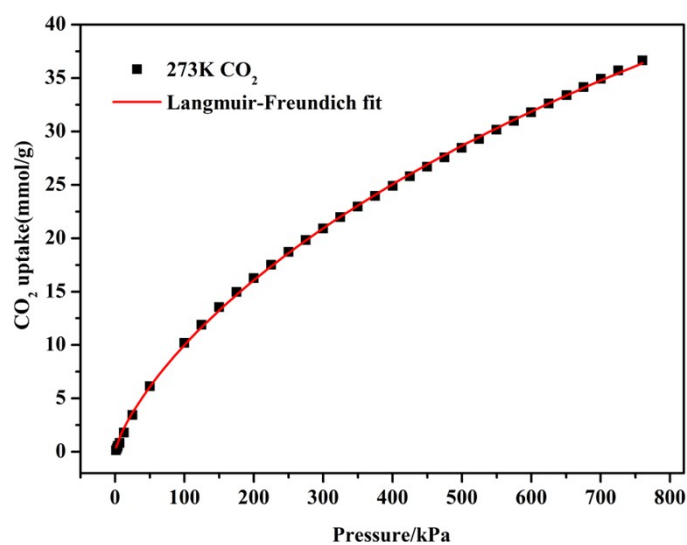

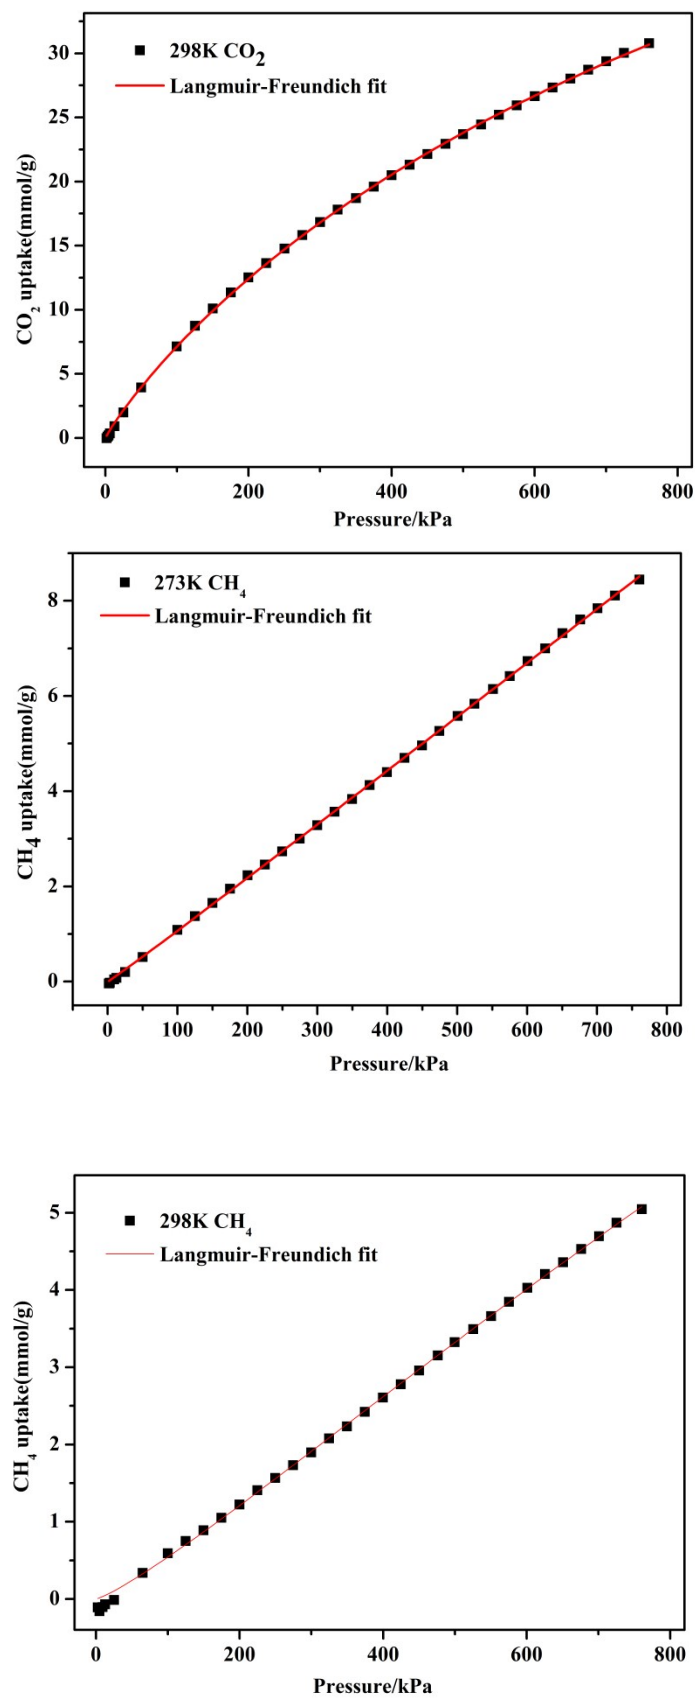

Fig. S5 CO<sub>2</sub> adsorption isotherms of **1a** at 273K with fitting by L-F model:  $a = 129.55713$ ,  $b$

= 0.00253,  $c = 0.75972$ ,  $\text{Chi}^2 = 0.04991$ ,  $R^2 = 0.99964$ ;  $\text{CO}_2$  adsorption isotherms of **1a** at 298K with fitting by L-F model:  $a = 82.60548$ ,  $b = 0.00147$ ,  $c = 0.90378$ ,  $\text{Chi}^2 = 0.01828$ ,  $R^2 = 0.99982$ ;  $\text{CH}_4$  adsorption isotherms of **1a** at 273K with fitting by L-F model:  $a = 367.05928$ ,  $b = 2.50324\text{E-}5$ ,  $c = 1.03326$ ,  $\text{Chi}^2 = 0.00128$ ,  $R^2 = 0.99983$ ;  $\text{CH}_4$  adsorption isotherms of **1a** at 298K with fitting by L-F model:  $a = 27.58489$ ,  $b = 8.27566\text{E-}5$ ,  $c = 1.19249$ ,  $\text{Chi}^2 = 0.00335$ ,  $R^2 = 0.99879$ .

### Calculation of sorption heat for $\text{CO}_2$ uptake using Virial 2 model

$$\ln P = \ln N + 1/T \sum_{i=0}^m aiN^i + \sum_{i=0}^n biN^i$$

$$Q_{st} = -R \sum_{i=0}^m aiN^i$$

The above equation was applied to fit the combined  $\text{CO}_2$  isotherm data for desolvated **1** at 273 and 298 K, where  $P$  is the pressure,  $N$  is the adsorbed amount,  $T$  is the temperature,  $ai$  and  $bi$  are virial coefficients, and  $m$  and  $n$  are the number of coefficients used to describe the isotherms.  $Q_{st}$  is the coverage-dependent enthalpy of adsorption and  $R$  is the universal gas constant.

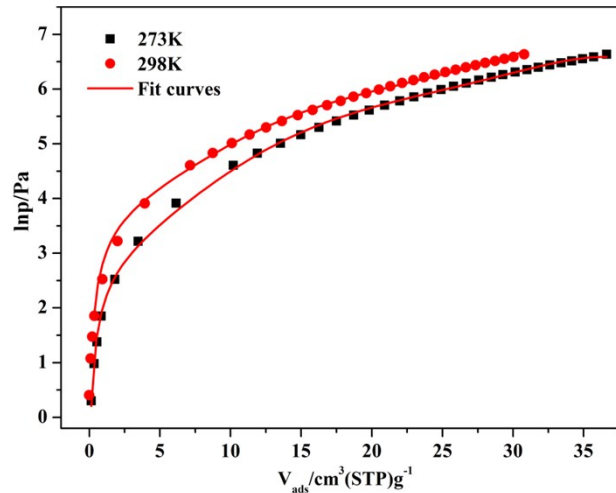

**Fig. S6** Virial analysis of the  $\text{CO}_2$  adsorption data at 273 and 298 K for **1**. Fitting results:  $a_0 = -2766.59447$ ,  $a_1 = 101.41552$ ,  $a_2 = 5.88105$ ,  $a_3 = -0.5561$ ,  $a_4 = 0.01453$ ,  $a_5 = -1.39362\text{E-}4$ ;  $\text{Chi}^2 = 0.01016$ ,  $R^2 = 0.99664$ .

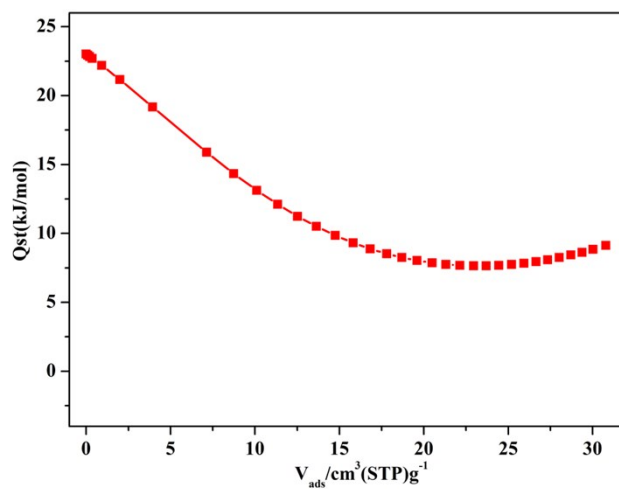

**Fig. S7** Isosteric heat of CO<sub>2</sub> adsorption for **1a** estimated by the virial equation from the adsorption isotherms at 273 and 298 K.

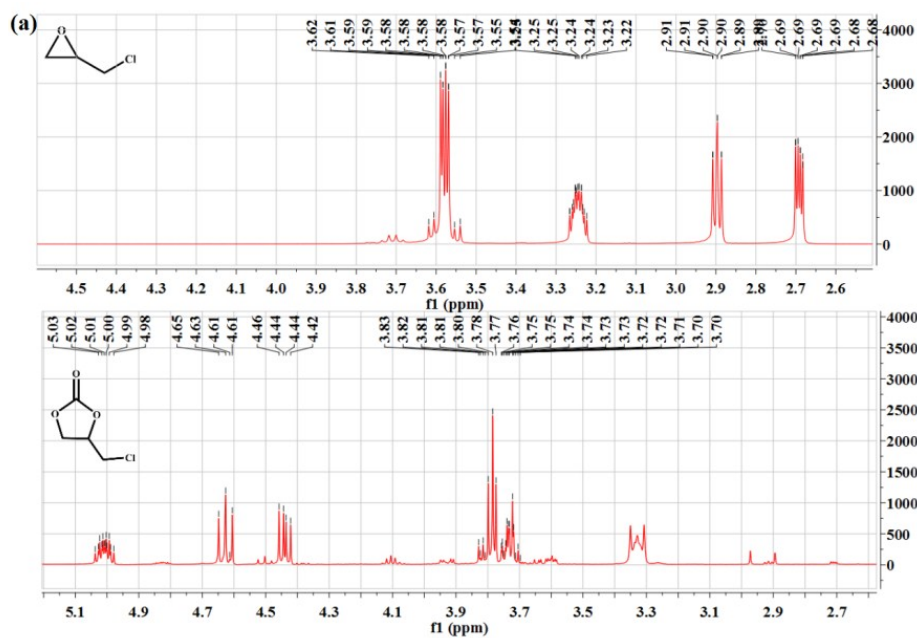



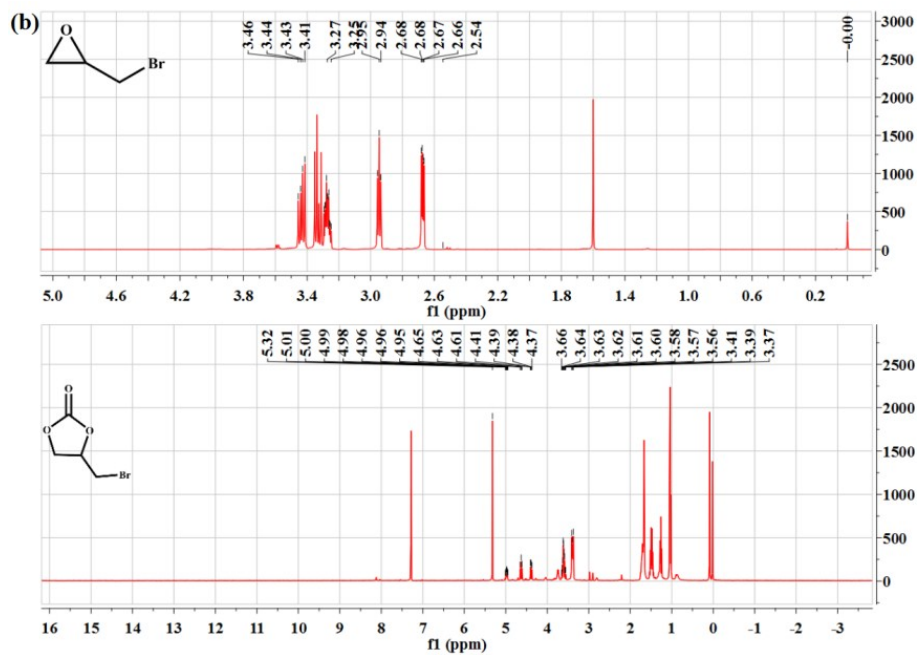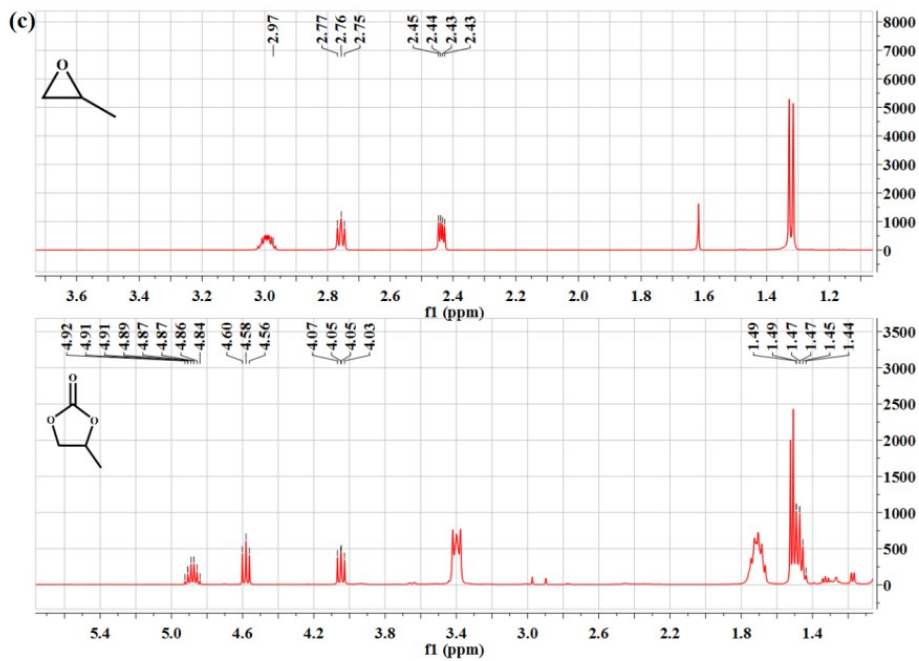

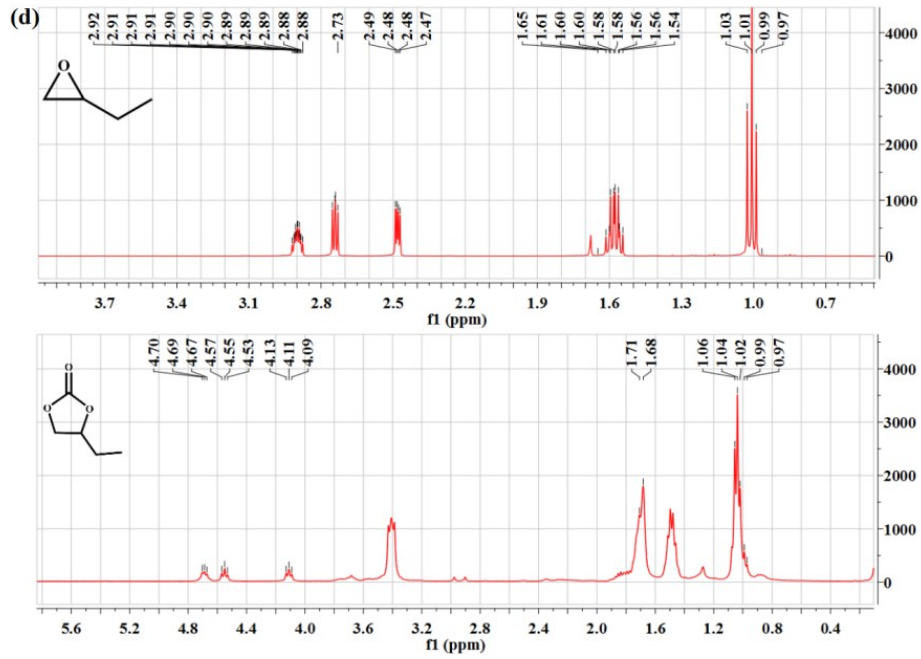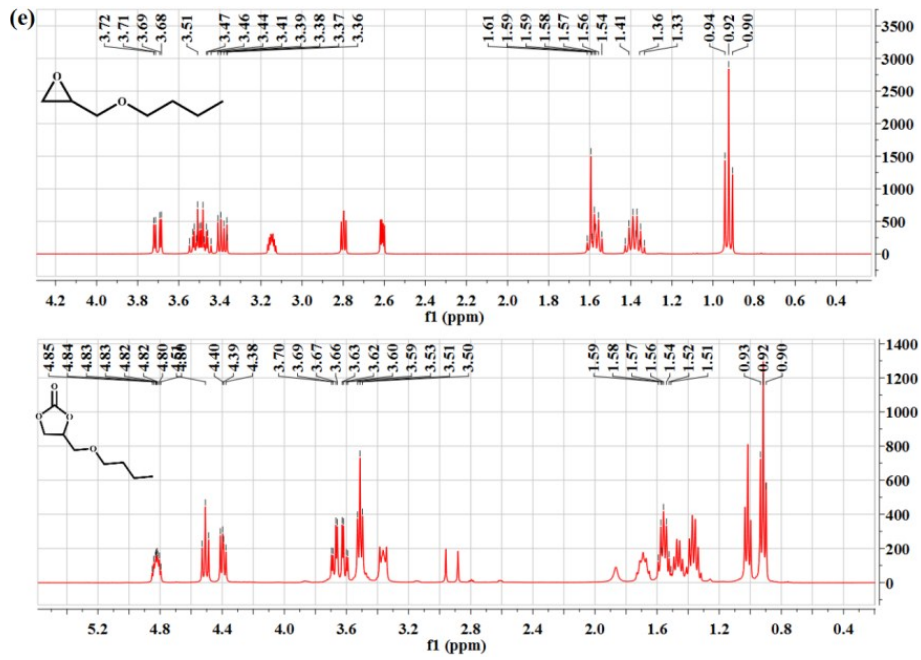

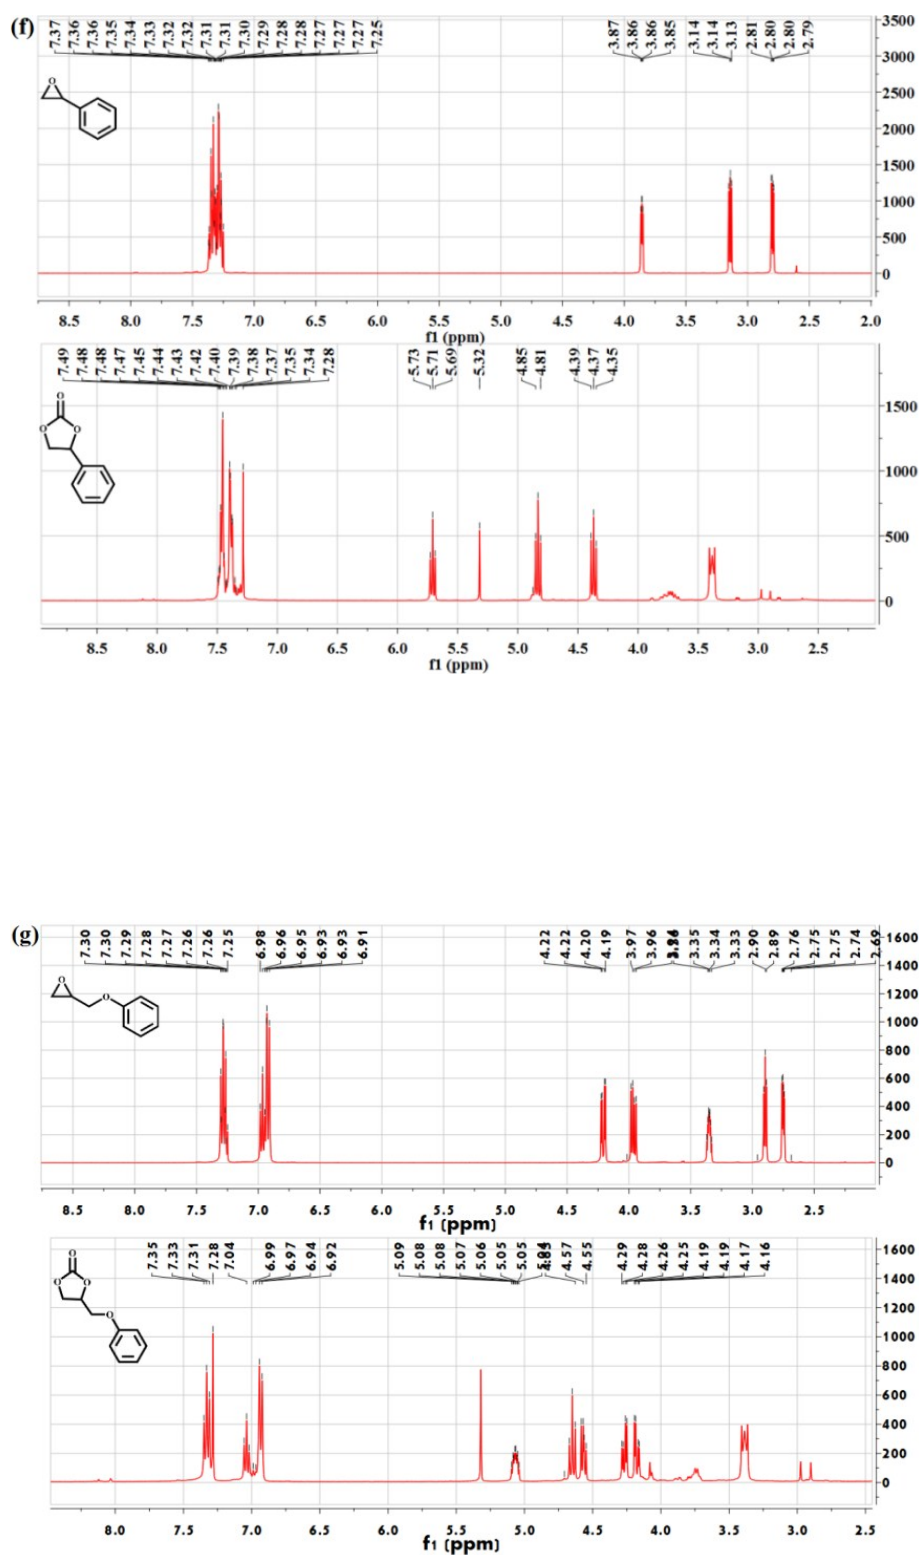

**Fig. S8** <sup>1</sup>H NMR spectrum of cyclic carbonate products of (a) 4-chloromethyl-1,3-dioxolan-2-one (b) 4-bromomethyl-1,3-dioxolan-2-one. (c) propylene carbonate. (d) 4-ethyl-1,3-dioxolan-2-one. (e) 3-butoxy-1,2-propylene carbonate. (f) styrene carbonate. (g) 4-(phenoxyethyl)-1,3-dioxolan-2-one in CDCl<sub>3</sub>.

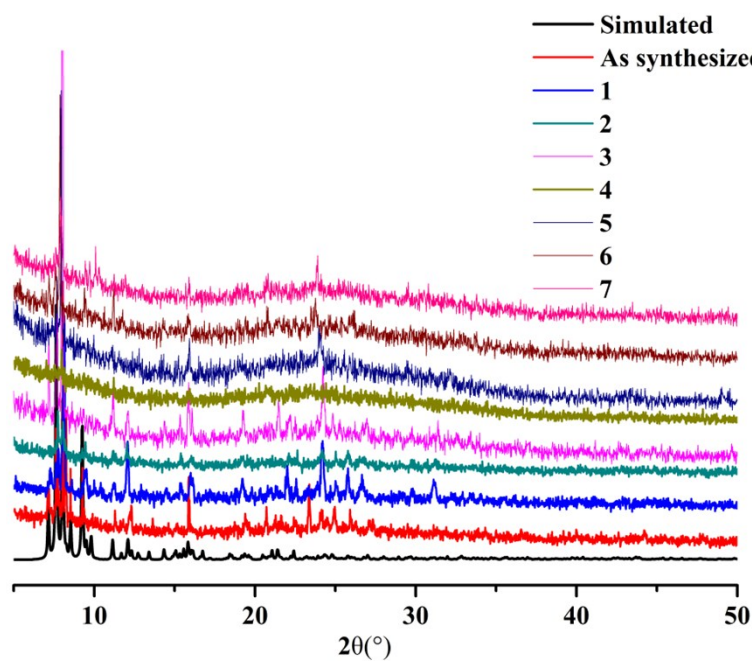

**Fig. S9** The PXRD patterns of compound **1** after six catalytic recycling. [ **1**: (-CH<sub>2</sub>-O-Ph) **2**: (-C<sub>2</sub>H<sub>5</sub>) **3**: (-CH<sub>3</sub>) **4**: (-CH<sub>2</sub>-O-C<sub>4</sub>H<sub>9</sub>) **5**: (-Ph) **6**: (-CH<sub>2</sub>-Br) **7**: (-CH<sub>2</sub>-Cl)].

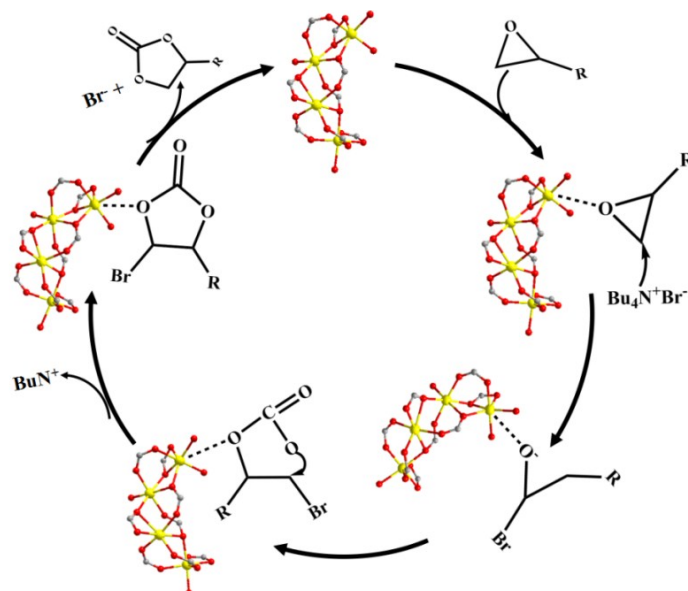

**Fig. S10** The possible mechanism for the cycloaddition reaction of epoxides with CO<sub>2</sub> into cyclic carbonates.

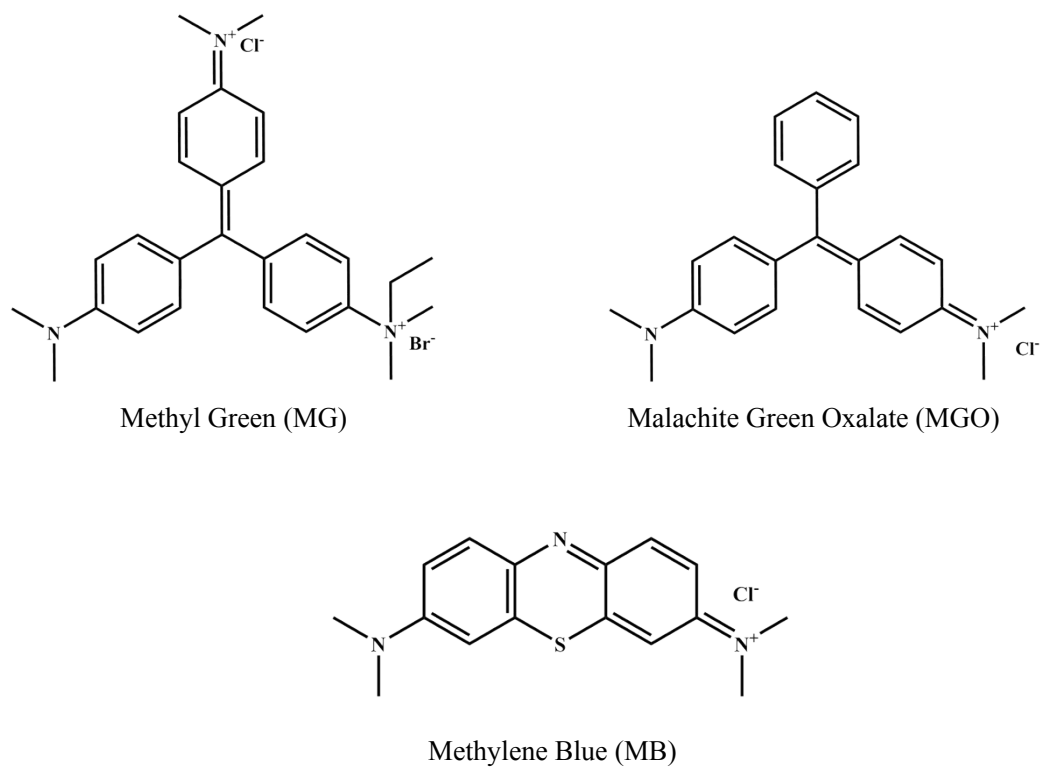

**Fig. S11** The structures of three kinds of dyes.

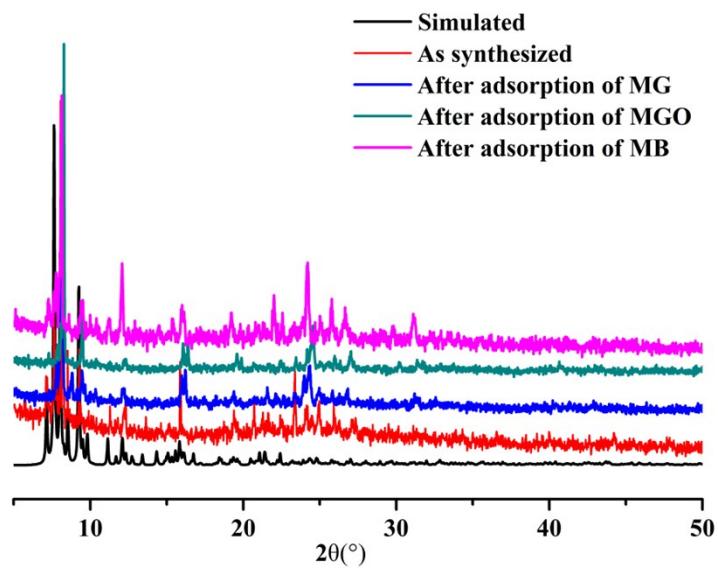

**Fig. S12** Stability of MOF 1 for MG, MGO and MB dyes.
